# Supplementary material for: Blockage of Notch Signaling Inhibits the Migration and Proliferation of Retinal Pigment Epithelial Cells
Source: Hindawi journal article supplement (doi:10.1155/2013/178708), 2013-01-01
Supplement: f1 [file 178708.f1.pdf]

# Supplementary

TABLE1 The primers of Notch signaling components used in real time

## RT-PCR

|          |                        |
|----------|------------------------|
| NOTCH1-F | GATGACCTGGGCAAGTCCG    |
| NOTCH1-R | TGCGCTCCTGTGCGATGT     |
| JAG1-F   | ACGACCCCCTGTGAAGTGAT   |
| JAG1-R   | TCCCGACTGACTCTTGCACT   |
| JAG2-F   | CGCCAATGAGTGTGAAGGGA   |
| JAG2-R   | TCGTTGACGTTGATATGGCAGT |
| DLL1-F   | ACCTCGCAACAGAAAACCCA   |
| DLL1-R   | GTGTTTCGTCACACACGAAGC  |
| DLL3-F   | GGTCCGAGCTCGTCCGTAG    |
| DLL3-R   | GAAAAGGGGCGTCGCTACC    |
| DLL4-F   | ATCAGCGATATGCTCCCCCA   |
| DLL4-R   | TGCCTTATACCTCCGTGGCA   |
| MAML1-F  | GCCACGCATCTTCATGATACAG |
| MAML1-R  | CCATTGGAAGAGATGGCAACTC |
| MAML2-F  | CTGATTGCGCTCCAGGGTTC   |
| MAML2-R  | TCCACAAAGCCATTGGGTCTG  |
| MAML3-F  | ACCACACGCTGATCATGCTAC  |
| MAML3-R  | GCACCATTCTGCTGGTCTCC   |

TABLE 2. The primers of Notch signaling target genes used in real-time RT-PCR

|         |                        |
|---------|------------------------|
| HES1-F  | GAAGAAAGATAGCTCGCGGCA  |
| HES1-R  | CCAGCACACTTGGGTCTGTG   |
| MYC-F   | GGTAGTGGAAAACCAGCAGCC  |
| MYC-R   | TTCTCCTCCTCGTCGCAGTA   |
| SOX9-F  | AGCTCTGGAGACTTCTGAACGA |
| SOX9-R  | GTTCTTCACCGACTTCCTCCG  |
| HEY2-F  | GCAACAGGGGGTAAAGGCTAC  |
| HEY2-R  | ACCGCGCAACTTCTGTTAGG   |
| GAPDH-F | CCCGCTTCGCTCTCTGCTCC   |
| GAPDH-R | ACCAGGCGCCAATACGACC    |
